# Supplementary material for: Cigarette consumption estimates for 71 countries from 1970 to 2015: systematic collection of comparable data to facilitate quasi-experimental evaluations of national and global tobacco control interventions
Source: PubMed Central journal article supplement (PMC6582269; doi:10.1136/bmj.l2231), 2019-06-19
Supplement: hofs048711.ww2.pdf [file hofs048711.ww2.pdf]

**Appendix B.** List of countries that required volunteer translators to contact by telephone

| <b>Language</b>   | <b>Translator Recruited?</b> | <b>Countries</b>                                                                 |
|-------------------|------------------------------|----------------------------------------------------------------------------------|
| <b>French</b>     | Yes                          | Haiti, Senegal, Equatorial Guinea, Gabon, Mali, Niger, Togo                      |
| <b>Russian</b>    | Yes                          | Russia, Kazakhstan, Kyrgyz                                                       |
| <b>Albanian</b>   | Yes                          | Kosovo                                                                           |
| <b>Spanish</b>    | Yes                          | Paraguay Peru, Venezuela, Dominican, El Salvador, Guatemala, Honduras, Nicaragua |
| <b>Arabic</b>     | Yes                          | Tunisia, Bahrain, Iraq, Syria                                                    |
| <b>Bengali</b>    | Yes                          | Bangladesh                                                                       |
| <b>Portuguese</b> | No                           | East Timor, Sao Tome & Principe                                                  |
| <b>Hungarian</b>  | No                           | Hungary                                                                          |
| <b>Latvian</b>    | No                           | Latvia                                                                           |
| <b>Ukrainian</b>  | No                           | Ukraine                                                                          |
| <b>Dzongkha</b>   | No                           | Bhutan                                                                           |
| <b>Malay</b>      | No                           | Brunei                                                                           |
| <b>Khmer</b>      | No                           | Cambodia                                                                         |
| <b>Lao</b>        | No                           | Lao PDR                                                                          |
