# Supplementary material for: Cigarette consumption estimates for 71 countries from 1970 to 2015: systematic collection of comparable data to facilitate quasi-experimental evaluations of national and global tobacco control interventions
Source: PubMed Central journal article supplement (PMC6582269; doi:10.1136/bmj.l2231), 2019-06-19
Supplement: hofs048711.ww4.pdf [file hofs048711.ww4.pdf]

**Appendix D.** Data collected and verified across countries and years

| Country                | Country Information   |                 | Number of years of data collected |         |         |             |
|------------------------|-----------------------|-----------------|-----------------------------------|---------|---------|-------------|
|                        | FCTC Date             | Population 2014 | Production                        | Imports | Exports | Consumption |
| Algeria                | Ratified: 30 Jun 2006 | 27,924,456      | 24                                | 35      | 26      | 16          |
| Argentina              | Signed: 25 Sep 2003   | 32,094,143      | 45                                | 40      | 37      | 37          |
| Armenia                | Acceded: 29 Nov 2004  | 2,441,458       | 18                                | 18      | 18      | 17          |
| Australia              | Ratified: 27 Oct 2004 | 19,179,830      | 44                                | 44      | 45      | 45          |
| Austria                | Ratified: 15 Sep 2005 | 7,295,673       | 45                                | 39      | 45      | 45          |
| Azerbaijan             | Acceded: 1 Nov 2005   | 7,498,994       | 18                                | 20      | 20      | 17          |
| Bangladesh             | Ratified: 14 Jun 2004 | 111,451,025     | 25                                | 45      | 38      | 22          |
| Belarus                | Ratified: 8 Sep 2005  | 7,992,598       | 18                                | 18      | 18      | 17          |
| Belgium                | Ratified: 1 Nov 2005  | 9,326,839       | 45                                | 34      | 45      | 45          |
| Bosnia and Herzegovina | Acceded: 10 Jul 2009  | 3,291,340       | 23                                | 23      | 18      | 18          |
| Brazil                 | Ratified: 3 Nov 2005  | 157,628,688     | 25                                | 46      | 28      | 46          |
| Bulgaria               | Ratified: 7 Nov 2005  | 6,191,839       | 45                                | 44      | 45      | 45          |
| Canada                 | Ratified: 26 Nov 2004 | 29,860,626      | 35                                | 39      | 44      | 45          |
| Chile                  | Ratified: 13 Jun 2005 | 14,124,866      | 0                                 | 45      | 41      | 30          |
| China                  | Ratified: 11 Oct 2005 | 1,132,635,009   | 27                                | 46      | 45      | 45          |
| Colombia               | Acceded: 10 Apr 2008  | 35,972,292      | 24                                | 45      | 46      | 42          |
| Croatia                | Ratified: 14 Jul 2008 | 3,616,756       | 24                                | 18      | 23      | 23          |
| Cuba                   | Signed: 29 Jun 2004   | 9,488,691       | 26                                | 45      | 38      | 39          |
| Czech Republic         | Ratified: 1 Jun 2012  | 8,967,629       | 22                                | 16      | 22      | 22          |
| Czechoslovakia         | N/A                   | N/A             | 23                                | 22      | 22      | 8           |
| Denmark                | Ratified: 16 Dec 2004 | 4,680,441       | 45                                | 38      | 45      | 45          |

|                                        |                       |             |    |    |    |    |
|----------------------------------------|-----------------------|-------------|----|----|----|----|
| Egypt                                  | Ratified: 25 Feb 2005 | 60,098,630  | 24 | 45 | 45 | 42 |
| Estonia                                | Ratified: 27 Jul 2005 | 1,113,037   | 19 | 13 | 19 | 19 |
| France                                 | Approved: 19 Oct 2004 | 52,262,503  | 45 | 39 | 45 | 45 |
| Germany                                | Ratified: 16 Dec 2004 | 70,144,789  | 46 | 44 | 45 | 45 |
| Greece                                 | Ratified: 27 Jan 2006 | 9,392,650   | 45 | 44 | 45 | 45 |
| Hungary                                | Ratified: 7 Apr 2004  | 8,445,822   | 45 | 39 | 45 | 43 |
| India                                  | Ratified: 5 Feb 2004  | 917,035,016 | 24 | 45 | 44 | 46 |
| Indonesia                              | Not a participant     | 183,355,151 | 26 | 43 | 45 | 44 |
| Iran, Islamic Republic of              | Ratified: 6 Nov 2005  | 59,712,480  | 25 | 44 | 46 | 46 |
| Ireland                                | Ratified: 7 Nov 2005  | 3,665,975   | 45 | 37 | 45 | 45 |
| Italy                                  | Ratified: 2 Jul 2008  | 51,525,967  | 45 | 39 | 45 | 45 |
| Japan                                  | Accepted: 8 Jun 2004  | 110,321,293 | 44 | 45 | 45 | 45 |
| Kazakhstan                             | Ratified: 22 Jan 2007 | 12,806,379  | 18 | 18 | 19 | 19 |
| Korea, Democratic People's Republic of | Ratified: 27 Apr 2005 | 19,653,913  | 24 | 24 | 28 | 19 |
| Korea, Republic of                     | Ratified: 16 May 2005 | 42,828,380  | 25 | 45 | 45 | 45 |
| Lebanon                                | Ratified: 7 Dec 2005  | 4,219,242   | 26 | 26 | 25 | 18 |
| Lithuania                              | Ratified: 16 Dec 2004 | 2,500,826   | 20 | 12 | 19 | 19 |
| Malaysia                               | Ratified: 16 Sep 2005 | 22,407,752  | 24 | 46 | 46 | 45 |
| Mexico                                 | Ratified: 28 May 2004 | 90,175,817  | 24 | 46 | 45 | 46 |
| Moldova, Republic of                   | Ratified: 3 Feb 2009  | 3,424,954   | 18 | 19 | 19 | 19 |
| Morocco                                | Signed: 16 Apr 2004   | 24,633,887  | 44 | 36 | 46 | 41 |
| Myanmar                                | Ratified: 21 Apr 2004 | 38,503,196  | 24 | 45 | 28 | 27 |
| Nepal                                  | Ratified: 7 Nov 2006  | 18,737,059  | 1  | 44 | 39 | 17 |

|                              |                       |             |    |    |    |    |
|------------------------------|-----------------------|-------------|----|----|----|----|
| Netherlands                  | Accepted: 27 Jan 2005 | 14,051,206  | 45 | 43 | 45 | 45 |
| Nigeria                      | Ratified: 20 Oct 2005 | 99,522,327  | 24 | 21 | 42 | 9  |
| Pakistan                     | Ratified: 3 Nov 2004  | 119,931,318 | 24 | 27 | 39 | 45 |
| Philippines                  | Ratified: 6 Jun 2005  | 67,175,64   | 25 | 44 | 45 | 45 |
| Poland                       | Ratified: 15 Sep 2006 | 32,833,383  | 45 | 45 | 35 | 25 |
| Portugal                     | Approved: 8 Nov 2005  | 8,917,102   | 45 | 39 | 45 | 45 |
| Romania                      | Ratified: 27 Jan 2006 | 16,603,346  | 45 | 29 | 26 | 25 |
| Russian Federation           | Acceded: 3 June 2008  | 119,908,242 | 19 | 19 | 19 | 19 |
| Saudi Arabia                 | Ratified: 9 May 2005  | 21,929,58   | 24 | 0  | 46 | 42 |
| Serbia and Montenegro        | Ratified: 8 Feb 2006  | 7,425,951   | 3  | 25 | 24 | 24 |
| Slovakia                     | Ratified: 4 May 2004  | 4,601,167   | 22 | 14 | 23 | 23 |
| Slovenia                     | Ratified: 15 Mar 2005 | 1,762,776   | 24 | 14 | 23 | 23 |
| South Africa                 | Ratified: 19 Apr 2005 | 37,976,334  | 46 | 44 | 45 | 45 |
| Spain                        | Ratified: 11 Jan 2005 | 39,366,146  | 45 | 43 | 45 | 45 |
| Sweden                       | Ratified: 7 Jul 2005  | 8,037,959   | 45 | 35 | 45 | 45 |
| Switzerland                  | Signed: 25 Jun 2004   | 6,988,340   | 46 | 39 | 45 | 45 |
| Syrian Arab Republic         | Ratified: 22 Nov 2004 | 11,975,289  | 25 | 42 | 37 | 21 |
| Taiwan                       | N/A                   | 20,156,45   | 45 | 24 | 30 | 30 |
| Tanzania, United Republic of | Ratified: 30 Apr 2007 | 28,456,00   | 23 | 44 | 45 | 45 |
| Thailand                     | Ratified: 8 Nov 2004  | 55,516,634  | 24 | 45 | 45 | 37 |
| Tunisia                      | Ratified: 7 Jun 2010  | 8,531,430   | 24 | 45 | 39 | 38 |
| Turkey                       | Ratified: 31 Dec 2004 | 57,352,620  | 44 | 44 | 31 | 30 |
| USSR (Former)                | N/A                   | N/A         | 26 | 26 | 26 | 26 |
| Ukraine                      | Ratified: 6 Jun 2006  | 38,367,853  | 18 | 19 | 19 | 19 |

|                                   |                       |             |    |    |    |    |
|-----------------------------------|-----------------------|-------------|----|----|----|----|
| United Kingdom                    | Ratified: 16 Dec 2004 | 52,894,193  | 46 | 44 | 45 | 45 |
| United States                     | Signed: 10 May 2004   | 258,370,118 | 46 | 46 | 45 | 45 |
| Uzbekistan                        | Acceded: 15 May 2012  | 21,030,084  | 18 | 18 | 18 | 18 |
| Venezuela, Bolivarian Republic of | Ratified: 27 Jun 2006 | 21,970,389  | 24 | 44 | 44 | 37 |
| Viet Nam                          | Ratified: 17 Dec 2004 | 70,984,334  | 24 | 40 | 24 | 21 |
| Yugoslavia                        | N/A                   | N/A         | 21 | 21 | 0  | 0  |
