# Supplementary material for: Cigarette consumption estimates for 71 countries from 1970 to 2015: systematic collection of comparable data to facilitate quasi-experimental evaluations of national and global tobacco control interventions
Source: PubMed Central journal article supplement (PMC6582269; doi:10.1136/bmj.l2231), 2019-06-19
Supplement: hofs048711.ww5.pdf [file hofs048711.ww5.pdf]

## Appendix E. Glossary of all acronyms used in the database

ABS: Australian Bureau of Statistics  
ADB: Asian Development Bank  
ADIC: Alcohol and Drug Information Centre (Ukraine)  
AMAR: Statistical Centre of Iran  
ANS: Azerbaijan National Statistics  
ASEAN: Association of Southeast Asian Nations  
BBS: Bangladesh Bureau of Statistics  
BIR: Bureau of Internal Revenue (Philippines)  
BIS: Bosnia Institute for Statistics  
CAPMAS: Central Agency for Public Mobilization and Statistics (Egypt)  
CAS: Central Administration of Statistics (Lebanon)  
CBSSYR: Central Bureau of Statistics (Syria)  
CDS: Central Department of Statistics (Saudi Arabia)  
CEFP: Centro de Estudios de las Finanzas Públicas (Mexico)  
CIS: Commonwealth of Independent States  
CSA: Central Statistical Agency (Ethiopia)  
CSB: Central Statistical Bureau (Latvia)  
CSO: Central Statistical Office (Poland)  
CSO: Central Statistics Organization (Afghanistan)  
CSO: Central Statistical Organisation (India)  
CSO: Central Statistical Organization (Myanmar)  
DANE: Departamento Administrativo Nacional de Estadística  
DGI: Dirección General Impositiva (Uruguay)  
DIAN: Dirección de Impuestos y Aduanas Nacionales de Colombia  
DoC: Department of Commerce (India)  
DOSM: Department of Statistics Malaysia  
EAM: Encuesta Anual Manufacturera (Colombia)  
EC: European Commission  
ECOWAS: Economic Community of West African States  
EIM: Encuesta Industrial Mensual (Mexico)  
EMIM: Encuesta Mensual de la Industria Manufacturera (Mexico)  
ERC: European Research Council  
Euro: Euromonitor  
EZV: Eidgenössische Zollverwaltung (Switzerland)  
FAO: Food and Agriculture Organization  
FTC: Federal Trade Commission (United States)  
GSO: General Statistics Office (Vietnam)  
HMRC: HM Revenue & Customs (United Kingdom)  
HNZ: Health New Zealand  
IIP: Index of Industrial Production (India)  
INE: Instituto Nacional de Estadística (Bolivia)  
INE: Instituto Nacional de Estadística (Chile)  
INEGI: Instituto Nacional de Estadística y Geografía (Mexico)  
INEI: Instituto Nacional de Estadística e Informática (Peru)  
INPES: Institut National de Prévention et d'Éducation pour la Santé (France)  
INSSE: National Institute of Statistics (Romania)

INTABACO: Instituto del Tabaco (Dominican Republic)  
IPI: Industrial Production Index (Turkey)  
ISS: International Smoking Statistics  
KazStat: Ministry of National Economy of the Republic of Kazakhstan Committee on Statistics  
MAGP: Ministerio de Agricultura Ganadería y Pesca  
Min Fin: Ministry of Finance (Indonesia)  
Min of Agr: Ministry of Agriculture & Rural Development (Indonesia)  
MinFin: Ministry of Finance (Thailand)  
MoF: Ministry of Finance (Turkey)  
NBS: National Bureau of Statistics (Moldova)  
NBS: National Bureau of Statistics (Nigeria)  
NBS: National Bureau of Statistics (Tanzania)  
NBSC: National Bureau of Statistics of China  
NSO: National Statistical Office (Mongolia)  
NTA: National Treasury Administration (Taiwan)  
ONE: Oficina Nacional de Estadísticas (Cuba)  
ONS: Office National des Statistiques (Algeria)  
SARS: South African Revenue Service  
SAT: Superintendencia de Administración Tributaria (Guatemala)  
SBP: State Bank of Pakistan  
SIAVI: Sistema de Información Arancelaria Vía Internet (Mexico)  
SORS: Statistical Office of the Republic of Serbia  
Stat.kg: National Statistical Committee of the Kyrgyz Republic  
TAJ: Tax Administration Jamaica  
TBOT: Tax Burden on Tobacco (United States)  
TTB: Alcohol and Tobacco Tax and Trade Bureau (United States)  
TTM: Thailand Tobacco Monopoly  
TurkStat: Turkish Statistical Institute  
UKRSTAT: State Statistical Service of Ukraine  
UN: United Nations  
UNSD: United Nations Statistics Division  
USDA: United States Department of Agriculture  
WHO: World Health Organization
